# Supplementary material for: Clinical landscape of macrophage-reprogramming cancer immunotherapies
Source: Springer Nature journal article supplement (doi:10.1038/s41416-024-02715-6), 2024-06-03
Supplement: MOESM1 [file 41416_2024_2715_MOESM1_ESM.pdf]

**Supplementary Table 1.** A list of cancer immunotherapeutic agents that reprogram macrophage function or phenotype.

| Target | Therapeutic*                              | Molecule type                 | Phase** | Trial ID                                                                                                                                                                                         |
|--------|-------------------------------------------|-------------------------------|---------|--------------------------------------------------------------------------------------------------------------------------------------------------------------------------------------------------|
| AHR    | IK-175                                    | Small molecule                | 1       | NCT04200963, NCT05472506                                                                                                                                                                         |
| CD163  | OR2805                                    | mAb                           | 1/2     | NCT05094804                                                                                                                                                                                      |
| CD24   | IMM47                                     | mAb                           | 1       | NCT05985083                                                                                                                                                                                      |
| CD24   | ATG-031                                   | mAb                           | 1       | NCT06028373                                                                                                                                                                                      |
| CD40   | Dacetuzumab;<br>SGN-40                    | mAb                           | 2       | NCT00079716, NCT00103779, NCT00283101,<br>NCT00435916, NCT00525447, NCT00529503,<br>NCT00556699, NCT00655837, NCT00664898                                                                        |
| CD40   | Selicrelumab;<br>CP-870,893;<br>RO7009789 | mAb                           | 1/2     | NCT02157831, NCT01008527, NCT01456585,<br>NCT02304393, NCT02588443, NCT02665416,<br>NCT02760797, NCT03193190, NCT03424005,<br>NCT03555149, NCT03892525                                           |
| CD40   | ChiLob 7/4                                | mAb                           | 1       | NCT01561911                                                                                                                                                                                      |
| CD40   | SEA-CD40                                  | mAb                           | 2       | NCT02376699, NCT04993677                                                                                                                                                                         |
| CD40   | Mitazalimab;<br>ADC-1013;<br>JNJ-64457107 | mAb                           | 1/2     | NCT02379741, NCT02829099, NCT05650918,<br>NCT04888312, NCT06205849                                                                                                                               |
| CD40   | Sotigalimab;<br>APX005M;<br>PYX-107       | mAb                           | 2       | NCT02482168, NCT02600949, NCT02706353,<br>NCT03123783, NCT03214250, NCT03165994,<br>NCT03389802, NCT03502330, NCT03597282,<br>NCT03719430, NCT04337931, NCT04130854,<br>NCT04495257, NCT05419479 |
| CD40   | ABBV-428                                  | Bispecific Ab<br>(Mesothelin) | 1       | NCT02955251                                                                                                                                                                                      |
| CD40   | ABBV-927                                  | mAb                           | 1/2     | NCT02988960, NCT03893955, NCT03818542,<br>NCT04807972                                                                                                                                            |
| CD40   | MEDI5083                                  | Fusion protein                | 1       | NCT03089645                                                                                                                                                                                      |
| CD40   | CDX-1140                                  | mAb                           | 2       | NCT03329950, NCT04491084, NCT04536077,<br>NCT04520711, NCT05029999, NCT05484011,<br>NCT04616248, NCT05349890, NCT05849480,<br>NCT05231122                                                        |
| CD40   | NG-350A                                   | Viral vector for mAb          | 1       | NCT03852511, NCT04787991, NCT05165433                                                                                                                                                            |
| CD40   | GEN1042;<br>BNT312                        | Bispecific Ab<br>(4-1BB)      | 1/2     | NCT04083599, NCT05491317, NCT06057038                                                                                                                                                            |
| CD40   | 2141 V-11                                 | mAb                           | 1/2     | NCT04059588, NCT04547777, NCT05126472,<br>NCT05734560                                                                                                                                            |
| CD40   | YH003                                     | mAb                           | 2       | NCT04481009, NCT05017623, NCT05031494,<br>NCT05176509, NCT05420324                                                                                                                               |
| CD40   | LVGN7409                                  | mAb                           | 1       | NCT04635995, NCT05152212, NCT05075993                                                                                                                                                            |
| CD40   | RO7300490;<br>RG6189                      | Bispecific Ab (FAP)           | 1       | NCT04857138                                                                                                                                                                                      |

|                       |                                           |                           |                     |                                                                                                                                                                                                                                                                                                                                                                                                                                 |
|-----------------------|-------------------------------------------|---------------------------|---------------------|---------------------------------------------------------------------------------------------------------------------------------------------------------------------------------------------------------------------------------------------------------------------------------------------------------------------------------------------------------------------------------------------------------------------------------|
| <b>CD40</b>           | MP0317                                    | Bispecific protein (FAP)  | 1                   | NCT05098405                                                                                                                                                                                                                                                                                                                                                                                                                     |
| <b>CD40</b>           | MIL-97                                    | mAb                       | 1                   | NCT04965077                                                                                                                                                                                                                                                                                                                                                                                                                     |
| <b>CD40</b>           | SHR-7367                                  | Bispecific (FAP)          | 1                   | NCT05740202                                                                                                                                                                                                                                                                                                                                                                                                                     |
| <b>CD40;<br/>CD47</b> | SL-172154                                 | Bispecific protein        | 1                   | NCT04406623, NCT04502888, NCT05275439,<br>NCT05483933                                                                                                                                                                                                                                                                                                                                                                           |
| <b>CD47</b>           | Magrolimab;<br>Hu5F9-G4                   | mAb                       | 3                   | NCT02216409, NCT02678338, NCT02953782,<br>NCT02953509, NCT03248479, NCT03558139,<br>NCT03527147, NCT03869190, NCT03922477,<br>NCT04435691, NCT04313881, NCT04541017,<br>NCT04778410, NCT04778397, NCT04751383,<br>NCT04854499, NCT04827576, NCT04892446,<br>NCT04958785, NCT04599634, NCT05169944,<br>NCT04788043, NCT05079230, NCT05330429,<br>NCT05738161, NCT05835011, NCT06046482,<br>NCT05829434, NCT05807126, NCT05367401 |
| <b>CD47</b>           | CC-90002                                  | mAb                       | 1                   | NCT02367196, NCT02641002                                                                                                                                                                                                                                                                                                                                                                                                        |
| <b>CD47</b>           | Ontopacept;<br>TTI-621;<br>PF-0791800     | Fusion protein            | 2                   | NCT02663518, NCT02890368, NCT04996004,<br>NCT05507541                                                                                                                                                                                                                                                                                                                                                                           |
| <b>CD47</b>           | Evorpaccept;<br>ALX148                    | Fusion protein            | <u>2</u> /3         | NCT03013218, NCT04417517, NCT04643002,<br>NCT04675294, NCT04755244, NCT05027139,<br>NCT05025800, NCT05002127, NCT05167409,<br>NCT05524545, NCT05467670, NCT05868226,<br>NCT05787639, NCT04675333                                                                                                                                                                                                                                |
| <b>CD47</b>           | SRF231                                    | mAb                       | 1                   | NCT03512340                                                                                                                                                                                                                                                                                                                                                                                                                     |
| <b>CD47</b>           | Maplirpaccept;<br>PF-07901801;<br>TTI-622 | Fusion protein            | 2                   | NCT03530683, NCT05139225, NCT05261490,<br>NCT05567887, NCT05675449, NCT05507541,<br>NCT05896774, NCT05626322, NCT05896163                                                                                                                                                                                                                                                                                                       |
| <b>CD47</b>           | SHR1603                                   | mAb                       | 1                   | NCT03722186                                                                                                                                                                                                                                                                                                                                                                                                                     |
| <b>CD47</b>           | IBI188                                    | mAb                       | 1                   | NCT03717103, NCT03763149, NCT04485052,<br>NCT04485065, NCT04861948                                                                                                                                                                                                                                                                                                                                                              |
| <b>CD47</b>           | AO-176                                    | mAb                       | <u>1</u> / <u>2</u> | NCT03834948, NCT04445701                                                                                                                                                                                                                                                                                                                                                                                                        |
| <b>CD47</b>           | TG-1801                                   | Bispecific Ab (CD19)      | 1                   | NCT03804996, NCT04806035                                                                                                                                                                                                                                                                                                                                                                                                        |
| <b>CD47</b>           | lemzoparlimab;<br>TJ011133                | mAb                       | 3                   | NCT03934814, NCT04202003, NCT04912063,<br>NCT05148533, NCT04895410, NCT05709093                                                                                                                                                                                                                                                                                                                                                 |
| <b>CD47</b>           | HX009                                     | Bispecific Ab (PD-1)      | 2                   | NCT04097769, NCT05731752, NCT04886271,<br>NCT05189093                                                                                                                                                                                                                                                                                                                                                                           |
| <b>CD47</b>           | SGN-CD47M                                 | Antibody–drug conjugate   | 1                   | NCT03957096                                                                                                                                                                                                                                                                                                                                                                                                                     |
| <b>CD47</b>           | IMM01                                     | Fusion protein            | <u>1</u> / <u>2</u> | NCT05860075, NCT05140811, NCT05833984                                                                                                                                                                                                                                                                                                                                                                                           |
| <b>CD47</b>           | IMM0306                                   | Bispecific protein (CD20) | <u>1</u> / <u>2</u> | NCT05805943, NCT04746131, NCT05771883                                                                                                                                                                                                                                                                                                                                                                                           |
| <b>CD47</b>           | ZL-1201                                   | mAb                       | 1                   | NCT04257617                                                                                                                                                                                                                                                                                                                                                                                                                     |

|      |                       |                              |             |                                                                                                                                               |
|------|-----------------------|------------------------------|-------------|-----------------------------------------------------------------------------------------------------------------------------------------------|
| CD47 | IMC-002               | mAb                          | 1           | NCT04306224, NCT05276310, NCT05946226                                                                                                         |
| CD47 | IBI322                | Bispecific Ab (PD-L1)        | 2           | NCT04328831, NCT04338659, NCT04795128, NCT04912466, NCT05296603, NCT05148442                                                                  |
| CD47 | DSP107                | Bispecific protein (4-1BB)   | 1/2         | NCT04440735, NCT04937166                                                                                                                      |
| CD47 | MIL-95                | mAb                          | 1           | NCT04651348                                                                                                                                   |
| CD47 | AK117;<br>Ligufalimab | mAb                          | 2           | NCT04349969, NCT04728334, NCT04900350, NCT04980885, NCT05214482, NCT05227664, NCT05229497, NCT05235542, NCT05382442, NCT05960955, NCT06196203 |
| CD47 | Gentulizumab          | mAb                          | 1           | NCT05263271, NCT05221385                                                                                                                      |
| CD47 | TQB2928               | mAb                          | 1           | NCT04854681, NCT05192512, NCT06008405                                                                                                         |
| CD47 | PF-07257876           | Bispecific Ab (PD-L1)        | 1           | NCT04881045                                                                                                                                   |
| CD47 | IBC0966               | Bispecific Ab (PD-L1)        | <u>1</u> /2 | NCT04980690                                                                                                                                   |
| CD47 | 6MW3211               | Bispecific Ab (PD-L1)        | 2           | NCT05048160, NCT05448599, NCT05431569, NCT05440045, NCT05446688                                                                               |
| CD47 | STI-6643              | mAb                          | 1           | NCT04900519                                                                                                                                   |
| CD47 | CPO107                | Bispecific protein (CD20)    | <u>1</u> /2 | NCT04853329                                                                                                                                   |
| CD47 | BAT7104               | Bispecific Ab (PD-L1)        | 1           | NCT05767060, NCT05200013                                                                                                                      |
| CD47 | IMM2902               | Bispecific protein (HER2)    | <u>1</u> /2 | NCT05805956, NCT05076591                                                                                                                      |
| CD47 | NI-1801               | Bispecific Ab (Mesothelin)   | 1           | NCT05403554                                                                                                                                   |
| CD47 | HMPL-A83              | mAb                          | 1           | NCT05429008                                                                                                                                   |
| CD47 | SG2501                | Bispecific Ab (CD38)         | 1           | NCT05293912                                                                                                                                   |
| CD47 | AUR103                | Small molecule               | 1           | NCT05607199                                                                                                                                   |
| CD47 | PT886                 | Bispecific Ab (Claudin 18.2) | <u>1</u> /2 | NCT05482893                                                                                                                                   |
| CD47 | IMM2520               | Bispecific protein (PD-L1)   | 1           | NCT05780307                                                                                                                                   |
| CD47 | SG1906                | Bispecific Ab (Claudin 18.2) | 1           | NCT05857332                                                                                                                                   |
| CD47 | PT217                 | Bispecific Ab (DLL3)         | 1           | NCT05652686                                                                                                                                   |
| CD47 | D3L-001               | Bispecific Ab (HER2)         | 1           | NCT05957536                                                                                                                                   |
| CD47 | HCB101                | Fusion protein               | 1           | NCT05892718                                                                                                                                   |

|                                 |                                                                     |                               |     |                                                                                                                                                                                                                                                                                                                                                                                                                                                                                                                                                                                                                                   |
|---------------------------------|---------------------------------------------------------------------|-------------------------------|-----|-----------------------------------------------------------------------------------------------------------------------------------------------------------------------------------------------------------------------------------------------------------------------------------------------------------------------------------------------------------------------------------------------------------------------------------------------------------------------------------------------------------------------------------------------------------------------------------------------------------------------------------|
| <b>C/EBP<math>\alpha</math></b> | MTL-CEBPA                                                           | Small activating RNA          | 2   | NCT02716012, NCT04105335, NCT05097911, NCT04710641                                                                                                                                                                                                                                                                                                                                                                                                                                                                                                                                                                                |
| <b>Cell therapy</b>             | CT-0508                                                             | Macrophage-based cell therapy | 1   | NCT04660929                                                                                                                                                                                                                                                                                                                                                                                                                                                                                                                                                                                                                       |
| <b>Cell therapy</b>             | CT-0525                                                             | Monocyte-based cell therapy   | 1   | NCT06254807                                                                                                                                                                                                                                                                                                                                                                                                                                                                                                                                                                                                                       |
| <b>Cell therapy</b>             | MT-101                                                              | Monocyte-based cell therapy   | 1/2 | NCT05138458                                                                                                                                                                                                                                                                                                                                                                                                                                                                                                                                                                                                                       |
| <b>Cell therapy</b>             | SIRPant-M; SI-101                                                   | Macrophage-based cell therapy | 1   | NCT05967416                                                                                                                                                                                                                                                                                                                                                                                                                                                                                                                                                                                                                       |
| <b>Cell therapy</b>             | Autologous monocytes, peginterferon alfa-2b and interferon gamma-1b | Monocyte-based cell therapy   | 1   | NCT02948426                                                                                                                                                                                                                                                                                                                                                                                                                                                                                                                                                                                                                       |
| <b>Clever-1</b>                 | Bexmarilimab; FP-1305                                               | mAb                           | 1/2 | NCT03733990, NCT05428969                                                                                                                                                                                                                                                                                                                                                                                                                                                                                                                                                                                                          |
| <b>Dectin-2</b>                 | BDC-3042                                                            | mAb                           | 1/2 | NCT06052852                                                                                                                                                                                                                                                                                                                                                                                                                                                                                                                                                                                                                       |
| <b>HDAC</b>                     | Tefinostat; CHR-2845                                                | Small molecule                | 1/2 | NCT00820508, NCT02759601                                                                                                                                                                                                                                                                                                                                                                                                                                                                                                                                                                                                          |
| <b>HMGB1</b>                    | SB17170                                                             | Small molecule                | 1   | NCT05522868                                                                                                                                                                                                                                                                                                                                                                                                                                                                                                                                                                                                                       |
| <b>IDO1</b>                     | Indoximod; NLG-8189; 1-methyl-D-tryptophan                          | Small molecule                | 2   | NCT00567931, NCT00739609, NCT01042535, NCT01191216, NCT01560923, NCT01792050, NCT02052648, NCT02073123, NCT02077881, NCT02502708, NCT02460367, NCT02835729, NCT03301636, NCT04049669, NCT05106296                                                                                                                                                                                                                                                                                                                                                                                                                                 |
| <b>IDO1</b>                     | Epacadostat; INCB024360                                             | Small molecule                | 3   | NCT01195311, NCT01604889, NCT01685255, NCT01822691, NCT01961115, NCT02178722, NCT02118285, NCT02042430, NCT02166905, NCT02298153, NCT02327078, NCT02318277, NCT02575807, NCT02364076, NCT02559492, NCT02785250, NCT02752074, NCT02862457, NCT02959437, NCT03085914, NCT03196232, NCT03277352, NCT03358472, NCT03361865, NCT03260894, NCT03322540, NCT03374488, NCT03348904, NCT03322566, NCT03322384, NCT03414229, NCT03006302, NCT03217669, NCT03291054, NCT03361228, NCT03347123, NCT03463161, NCT03493945, NCT03589651, NCT03602586, NCT03707457, NCT03823131, NCT03471286, NCT03516708, NCT03532295, NCT04463771, NCT04586244 |
| <b>IDO1</b>                     | GDC-0919; navoximod                                                 | Small molecule                | 1   | NCT02048709, NCT02471846                                                                                                                                                                                                                                                                                                                                                                                                                                                                                                                                                                                                          |
| <b>IDO1</b>                     | BMS-986205; linrodostat                                             | Small molecule                | 3   | NCT02658890, NCT02750514, NCT02935634, NCT02996110, NCT03192943, NCT03247283, NCT03346837, NCT03329846, NCT03335540, NCT03459222, NCT03519256, NCT03695250,                                                                                                                                                                                                                                                                                                                                                                                                                                                                       |

|                           |                      |                      |            |                                                                                                                                                                         |
|---------------------------|----------------------|----------------------|------------|-------------------------------------------------------------------------------------------------------------------------------------------------------------------------|
|                           |                      |                      |            | NCT03792750, NCT03854032, NCT04047706, NCT04106414                                                                                                                      |
| <b>IDO1</b>               | KHK2455              | Small molecule       | 1          | NCT02867007, NCT03915405                                                                                                                                                |
| <b>IDO1</b>               | PF-06840003          | Small molecule       | 1          | NCT02764151                                                                                                                                                             |
| <b>IDO1</b>               | NLG802               | Small molecule       | 1          | NCT03164603                                                                                                                                                             |
| <b>IDO1</b>               | LY3381916            | Small molecule       | 1          | NCT03343613                                                                                                                                                             |
| <b>IDO1</b>               | MK-7162              | Small molecule       | 1          | NCT03364049                                                                                                                                                             |
| <b>IDO1;<br/>TDO</b>      | HTI 1090;<br>SHR9146 | Small molecule       | 1          | NCT03208959, NCT03491631                                                                                                                                                |
| <b>IDO1;<br/>TDO</b>      | M4112                | Small molecule       | 1          | NCT03306420                                                                                                                                                             |
| <b>IDO1;<br/>TDO</b>      | DN1406131            | Small molecule       | 1          | NCT03641794                                                                                                                                                             |
| <b>IDO1;<br/>TDO</b>      | LPM-3480226          | Small molecule       | 1          | NCT03844438                                                                                                                                                             |
| <b>LAIR1</b>              | NGM438               | mAb                  | 1          | NCT05311618                                                                                                                                                             |
| <b>LAIR1</b>              | NC410                | Fusion protein       | <u>1/2</u> | NCT04408599, NCT05572684                                                                                                                                                |
| <b>LILRB1</b>             | SAR444881;<br>BND-22 | mAb                  | <u>1/2</u> | NCT04717375                                                                                                                                                             |
| <b>LILRB1</b>             | AGEN1571             | mAb                  | 1          | NCT05377528                                                                                                                                                             |
| <b>LILRB2</b>             | MK-4830              | mAb                  | 2          | NCT03564691, NCT04165070, NCT04165096, NCT04303169, NCT04626518, NCT04165083, NCT04895722, NCT04924101, NCT04541108, NCT04938817, NCT05446870, NCT05342636, NCT05319730 |
| <b>LILRB2</b>             | JTX-8064             | mAb                  | 1/2        | NCT04669899                                                                                                                                                             |
| <b>LILRB2</b>             | IO-108               | mAb                  | 1          | NCT05054348, NCT05508100                                                                                                                                                |
| <b>LILRB2</b>             | BMS-986406           | mAb                  | 1          | NCT05298592                                                                                                                                                             |
| <b>LILRB2</b>             | CDX-585              | Bispecific Ab (PD-1) | 1          | NCT05788484                                                                                                                                                             |
| <b>LILRB2</b>             | ES009                | mAb                  | 1          | NCT06007482                                                                                                                                                             |
| <b>LILRB2</b>             | OR502                | mAb                  | <u>1/2</u> | NCT06090266                                                                                                                                                             |
| <b>LILRB2;<br/>LILRB1</b> | NGM707               | mAb                  | <u>1/2</u> | NCT04913337                                                                                                                                                             |
| <b>LILRB2;<br/>LILRB1</b> | IOS-1002             | Fusion protein       | 1          | NCT05763004                                                                                                                                                             |
| <b>LILRB4</b>             | MK-0482              | mAb                  | 2          | NCT03918278, NCT04165070, NCT04165096, NCT04165083, NCT04541108, NCT05038800                                                                                            |
| <b>LILRB4</b>             | NGM831               | mAb                  | 1          | NCT05215574                                                                                                                                                             |
| <b>LILRB4</b>             | IO-202               | mAb                  | 1          | NCT05309187                                                                                                                                                             |

|                                                                       |                          |                               |             |                                                                                                                                                                                                                                                                                                                                                                                                                                                              |
|-----------------------------------------------------------------------|--------------------------|-------------------------------|-------------|--------------------------------------------------------------------------------------------------------------------------------------------------------------------------------------------------------------------------------------------------------------------------------------------------------------------------------------------------------------------------------------------------------------------------------------------------------------|
| <b>PI3K<math>\gamma</math></b>                                        | Eganelisib;<br>IPI-549   | Small molecule                | 2           | NCT02637531, NCT03719326, NCT03980041,<br>NCT03961698, NCT03795610                                                                                                                                                                                                                                                                                                                                                                                           |
| <b>PI3K<math>\gamma</math></b>                                        | ZX-4081                  | Small molecule                | <u>1</u> /2 | NCT05118841                                                                                                                                                                                                                                                                                                                                                                                                                                                  |
| <b>PI3K<math>\gamma</math></b>                                        | HS248                    | Small molecule                | 1           | NCT05759234                                                                                                                                                                                                                                                                                                                                                                                                                                                  |
| <b>PI3K<math>\gamma</math>;<br/>PI3K<math>\delta</math></b>           | Duvelisib;<br>IPI-145    | Small molecule                | Appr.       | NCT01476657, NCT01871675, NCT01882803,<br>NCT02004522, NCT02049515, NCT02158091,<br>NCT02204982, NCT02391545, NCT02292225,<br>NCT02598570, NCT02711852, NCT02783625,<br>NCT03372057, NCT03534323, NCT04038359,<br>NCT03892044, NCT04707079, NCT03961672,<br>NCT04193293, NCT04331119, NCT04209621,<br>NCT04688658, NCT04803201, NCT05010005,<br>NCT05057247, NCT04652960, NCT05065866,<br>NCT04890236, NCT05044039, NCT05508659,<br>NCT05675813, NCT05976997 |
| <b>PI3K<math>\gamma</math>;<br/>PI3K<math>\delta</math>;<br/>SIK3</b> | Tenalisib;<br>RP6530     | Small molecule                | 2           | NCT02017613, NCT02567656, NCT03471351,<br>NCT03711578, NCT03711604, NCT03770000,<br>NCT04204057, NCT05021900                                                                                                                                                                                                                                                                                                                                                 |
| <b>PI3K<math>\gamma</math>;<br/>PI3K<math>\delta</math></b>           | ZX-101A                  | Small molecule                | 1           | NCT04504708, NCT05269940, NCT05258266                                                                                                                                                                                                                                                                                                                                                                                                                        |
| <b>Siglec-15</b>                                                      | NC318                    | mAb                           | 2           | NCT03665285, NCT04699123                                                                                                                                                                                                                                                                                                                                                                                                                                     |
| <b>Siglec-15</b>                                                      | PYX-106                  | mAb                           | 1           | NCT05718557                                                                                                                                                                                                                                                                                                                                                                                                                                                  |
| <b>SIRP<math>\alpha</math></b>                                        | CC-95251                 | mAb                           | 1           | NCT03783403, NCT05168202                                                                                                                                                                                                                                                                                                                                                                                                                                     |
| <b>SIRP<math>\alpha</math></b>                                        | BI 765063                | mAb                           | 1           | NCT03990233, NCT04653142, NCT05068102,<br>NCT05249426, NCT05446129                                                                                                                                                                                                                                                                                                                                                                                           |
| <b>SIRP<math>\alpha</math></b>                                        | GS-0189                  | mAb                           | 1           | NCT04502706                                                                                                                                                                                                                                                                                                                                                                                                                                                  |
| <b>SIRP<math>\alpha</math></b>                                        | BR105;<br>lumistobart    | mAb                           | 1           | NCT05351697                                                                                                                                                                                                                                                                                                                                                                                                                                                  |
| <b>SIRP<math>\alpha</math></b>                                        | LM-101                   | mAb                           | <u>1</u> /2 | NCT05615974                                                                                                                                                                                                                                                                                                                                                                                                                                                  |
| <b>SIRP<math>\alpha</math></b>                                        | ADU-1805                 | mAb                           | 1           | NCT05856981                                                                                                                                                                                                                                                                                                                                                                                                                                                  |
| <b>SIRP<math>\alpha</math></b>                                        | BYON4228                 | mAb                           | 1           | NCT05737628                                                                                                                                                                                                                                                                                                                                                                                                                                                  |
| <b>STAT3</b>                                                          | OPB-31121                | Small molecule                | 1/2         | NCT00511082, NCT00657176, NCT01029509,<br>NCT00955812, NCT01406574                                                                                                                                                                                                                                                                                                                                                                                           |
| <b>STAT3</b>                                                          | Napabucasin;<br>BBI608   | Small molecule                | 3           | NCT01775423, NCT01325441, NCT01776307,<br>NCT01830621, NCT02024607, NCT02231723,<br>NCT02178956, NCT02279719, NCT02347917,<br>NCT02358395, NCT02315534, NCT02432326,<br>NCT02352558, NCT02467361, NCT02641873,<br>NCT02753127, NCT02851004, NCT02826161,<br>NCT02993731, NCT03522649, NCT03647839,<br>NCT03721744                                                                                                                                            |
| <b>STAT3</b>                                                          | OPB-51602                | Small molecule                | 1           | NCT01184807, NCT01423903, NCT01344876,<br>NCT02058017                                                                                                                                                                                                                                                                                                                                                                                                        |
| <b>STAT3</b>                                                          | AZD9150;<br>danvatirsen; | Anti-sense<br>oligonucleotide | 2           | NCT01563302, NCT01839604, NCT02417753,<br>NCT02499328, NCT02549651, NCT02546661,<br>NCT02983578, NCT03334617, NCT03394144,                                                                                                                                                                                                                                                                                                                                   |

|              |                       |                                                      |     |                                                                                           |
|--------------|-----------------------|------------------------------------------------------|-----|-------------------------------------------------------------------------------------------|
|              | IONIS-STAT3Rx         |                                                      |     | NCT03421353, NCT03527147, NCT03819465, NCT03794544, NCT05814666                           |
| <b>STAT3</b> | OPB-111077            | Small molecule                                       | 2   | NCT01711034, NCT01942083, NCT02250170, NCT03063944, NCT03158324, NCT03197714, NCT04049825 |
| <b>STAT3</b> | TTL-101               | Small molecule                                       | 1/2 | NCT03195699, NCT05384119, NCT05440708, NCT06141031                                        |
| <b>STAT3</b> | DSP-0337              | Small molecule                                       | 1   | NCT03416816                                                                               |
| <b>STAT3</b> | WP1066                | Small molecule                                       | 2   | NCT01904123, NCT04334863, NCT05879250                                                     |
| <b>STAT3</b> | DCR-STAT3             | Small interfering RNA                                | 1   | NCT06098651                                                                               |
| <b>STAT6</b> | ExoASO-STAT6; CDK-004 | Exosome-based delivery of anti-sense oligonucleotide | 1   | NCT05375604                                                                               |
| <b>STING</b> | MIW815; ADU-S100      | Small molecule                                       | 2   | NCT02675439, NCT03172936, NCT03937141                                                     |
| <b>STING</b> | MK-1454; ulevostinag  | Small molecule                                       | 2   | NCT03010176, NCT04220866                                                                  |
| <b>STING</b> | MK-2118               | Small molecule                                       | 1   | NCT03249792                                                                               |
| <b>STING</b> | GSK3745417            | Small molecule                                       | 1   | NCT03843359, NCT05424380                                                                  |
| <b>STING</b> | BMS-986301            | Small molecule                                       | 1   | NCT03956680                                                                               |
| <b>STING</b> | IMSA101               | Small molecule                                       | 2   | NCT04020185, NCT05846646, NCT05846659, NCT06026254                                        |
| <b>STING</b> | SB 11285              | Small molecule                                       | 1   | NCT04096638                                                                               |
| <b>STING</b> | SYNB1891              | Bacterial vector                                     | 1   | NCT04167137                                                                               |
| <b>STING</b> | E7766                 | Small molecule                                       | 1   | NCT04144140                                                                               |
| <b>STING</b> | TAK-676; dazostinag   | Small molecule                                       | 1/2 | NCT04420884, NCT06062602, NCT04879849                                                     |
| <b>STING</b> | exoSTING; CDK-002     | Exosome-based delivery of STING agonist              | 1/2 | NCT04592484                                                                               |
| <b>STING</b> | SNX281                | Small molecule                                       | 1   | NCT04609579                                                                               |
| <b>STING</b> | HG381                 | Small molecule                                       | 1   | NCT04998422                                                                               |
| <b>STING</b> | TAK-500               | Antibody–drug conjugate (CCR2)                       | 1/2 | NCT05070247                                                                               |
| <b>STING</b> | KL340399              | Small molecule                                       | 1   | NCT05387928, NCT05549804                                                                  |
| <b>STING</b> | BI 1387446            | Small molecule                                       | 1   | NCT04147234                                                                               |
| <b>STING</b> | BI 1703880            | Small molecule                                       | 1   | NCT05471856                                                                               |
| <b>STING</b> | XMT-2056              | Antibody–drug conjugate (HER2)                       | 1   | NCT05514717                                                                               |

|                       |                                              |                                     |      |                                                                                                                                                                                                                                                                                                                                                                                                                                                                                                                                                                                                                                                                                                                                           |
|-----------------------|----------------------------------------------|-------------------------------------|------|-------------------------------------------------------------------------------------------------------------------------------------------------------------------------------------------------------------------------------------------------------------------------------------------------------------------------------------------------------------------------------------------------------------------------------------------------------------------------------------------------------------------------------------------------------------------------------------------------------------------------------------------------------------------------------------------------------------------------------------------|
| <b>STING</b>          | CRD3874                                      | Small molecule                      | 1    | NCT06021626                                                                                                                                                                                                                                                                                                                                                                                                                                                                                                                                                                                                                                                                                                                               |
| <b>STING</b>          | ONM501                                       | STING-agonist in polymeric micelles | 1    | NCT06022029                                                                                                                                                                                                                                                                                                                                                                                                                                                                                                                                                                                                                                                                                                                               |
| <b>TLR2;<br/>TLR4</b> | OM-174;<br>CRX-527                           | Synthetic lipid A analogue          | 1    | NCT01800812                                                                                                                                                                                                                                                                                                                                                                                                                                                                                                                                                                                                                                                                                                                               |
| <b>TLR3</b>           | Hiltonol;<br>poly-ICLC                       | Nucleic-acid based                  | 2    | NCT00052715, NCT00058123, NCT00553683, NCT00880867, NCT01188096, NCT01984892, NCT02061449, NCT02643303, NCT03162562, NCT02834052, NCT03721679, NCT04116320, NCT05281926, NCT04544007, NCT06064279                                                                                                                                                                                                                                                                                                                                                                                                                                                                                                                                         |
| <b>TLR3</b>           | Rintatolimod;<br>ampligen                    | Nucleic-acid based                  | 2    | NCT01545141, NCT03403634, NCT03599453, NCT03734692, NCT03899987, NCT04081389, NCT04379518, NCT05927142, NCT05494697, NCT05756166                                                                                                                                                                                                                                                                                                                                                                                                                                                                                                                                                                                                          |
| <b>TLR3</b>           | BO-112                                       | Nucleic-acid based                  | 2    | NCT02828098, NCT04508140, NCT04420975, NCT04570332, NCT04777708, NCT05265650                                                                                                                                                                                                                                                                                                                                                                                                                                                                                                                                                                                                                                                              |
| <b>TLR4</b>           | G100; GLA-SE                                 | Synthetic lipid A derivative        | 2    | NCT02035657, NCT02180698, NCT02406781, NCT02501473                                                                                                                                                                                                                                                                                                                                                                                                                                                                                                                                                                                                                                                                                        |
| <b>TLR4</b>           | GSK1795091                                   | Synthetic lipid A analogue          | 1    | NCT03447314                                                                                                                                                                                                                                                                                                                                                                                                                                                                                                                                                                                                                                                                                                                               |
| <b>TLR5</b>           | entolimod;<br>CBLB502                        | Recombinant protein                 | 2    | NCT01527136, NCT02715882                                                                                                                                                                                                                                                                                                                                                                                                                                                                                                                                                                                                                                                                                                                  |
| <b>TLR5</b>           | mobilan;<br>M-VM3                            | Viral vector for TLR5 and entolimod | 1/2  | NCT02654938, NCT02844699                                                                                                                                                                                                                                                                                                                                                                                                                                                                                                                                                                                                                                                                                                                  |
| <b>TLR7</b>           | Imiquimod;<br>aldara;<br>TMX-101;<br>UGN-201 | Small molecule                      | Apr. | NCT00031759, NCT00189241, NCT00189306, NCT00204555, NCT00066872, NCT00189280, NCT00129519, NCT00079300, NCT00314756, NCT00707174, NCT00273910, NCT00453050, NCT00384124, NCT00504023, NCT00581425, NCT00785122, NCT00941811, NCT00803907, NCT00821964, NCT01212549, NCT00865644, NCT00899574, NCT00941252, NCT01161888, NCT01088737, NCT01264731, NCT01421017, NCT01720407, NCT01731652, NCT01283763, NCT01861535, NCT02135419, NCT02329171, NCT02130323, NCT02394132, NCT02059499, NCT02242929, NCT02669459, NCT02917746, NCT00463359, NCT03206138, NCT03180684, NCT03276832, NCT03233412, NCT03116659, NCT04279535, NCT03370406, NCT04859361, NCT03872947, NCT03534947, NCT03196180, NCT03982004, NCT05055050, NCT04883645, NCT05375903 |
| <b>TLR7</b>           | PF-4878691;<br>852-A                         | Small molecule                      | 2    | NCT00095160, NCT00091689, NCT00189332, NCT00276159, NCT00319748                                                                                                                                                                                                                                                                                                                                                                                                                                                                                                                                                                                                                                                                           |
| <b>TLR7</b>           | LHC-165                                      | Small molecule                      | 1    | NCT03301896                                                                                                                                                                                                                                                                                                                                                                                                                                                                                                                                                                                                                                                                                                                               |
| <b>TLR7</b>           | DSP-0509;<br>guretolimod                     | Small molecule                      | 1/2  | NCT03416335                                                                                                                                                                                                                                                                                                                                                                                                                                                                                                                                                                                                                                                                                                                               |

|                       |                              |                                |     |                                                                                                                                                                                      |
|-----------------------|------------------------------|--------------------------------|-----|--------------------------------------------------------------------------------------------------------------------------------------------------------------------------------------|
| <b>TLR7</b>           | NJH395                       | Antibody–drug conjugate (HER2) | 1   | NCT03696771                                                                                                                                                                          |
| <b>TLR7</b>           | BNT411                       | Small molecule                 | 1/2 | NCT04101357                                                                                                                                                                          |
| <b>TLR7</b>           | TQ-A3334                     | Small molecule                 | 1/2 | NCT04273815                                                                                                                                                                          |
| <b>TLR7</b>           | RO7119929                    | Small molecule prodrug         | 1   | NCT04338685                                                                                                                                                                          |
| <b>TLR7</b>           | SHR2150                      | Small molecule                 | 1/2 | NCT04588324                                                                                                                                                                          |
| <b>TLR7</b>           | MBS8(1V270)                  | Micellar TLR-agonist           | 1   | NCT04855435                                                                                                                                                                          |
| <b>TLR7</b>           | CAN1012                      | Small molecule                 | 1   | NCT04987112, NCT05580991                                                                                                                                                             |
| <b>TLR7;<br/>TLR8</b> | Resiquimod;<br>R848; STM-416 | Small molecule                 | 1/2 | NCT01676831, NCT01808950, NCT05710848                                                                                                                                                |
| <b>TLR7;<br/>TLR8</b> | telratolimod;<br>MEDI9197    | Small molecule                 | 1   | NCT02556463                                                                                                                                                                          |
| <b>TLR7;<br/>TLR8</b> | BDB001;<br>EIK1001           | Small molecule                 | 2   | NCT03486301, NCT04196530, NCT03915678, NCT04840394, NCT04819373, NCT06246110                                                                                                         |
| <b>TLR7;<br/>TLR8</b> | NKTR-262                     | Small molecule                 | 1/2 | NCT03435640                                                                                                                                                                          |
| <b>TLR7;<br/>TLR8</b> | BDC-1001                     | Antibody–drug conjugate (HER2) | 2   | NCT04278144, NCT05954143                                                                                                                                                             |
| <b>TLR7;<br/>TLR8</b> | TransCon                     | Hydrogel with resiquimod       | 2   | NCT04799054, NCT05081609, NCT05980598                                                                                                                                                |
| <b>TLR7;<br/>TLR8</b> | BDB018                       | Small molecule                 | 1   | NCT04840394                                                                                                                                                                          |
| <b>TLR8</b>           | motolimod;<br>VTX-2337       | Small molecule                 | 2   | NCT00688415, NCT01294293, NCT01334177, NCT01289210, NCT01666444, NCT01836029, NCT02124850, NCT02431559, NCT02650635, NCT03906526, NCT04272333                                        |
| <b>TLR8</b>           | DN-1508052                   | Small molecule                 | 1   | NCT03934359                                                                                                                                                                          |
| <b>TLR8</b>           | SBT6050                      | Antibody–drug conjugate (HER2) | 1/2 | NCT04460456, NCT05091528                                                                                                                                                             |
| <b>TLR9</b>           | PF-03512676;<br>CpG 7909     | Nucleic-acid based             | 2   | NCT00031278, NCT00043407, NCT00040950, NCT00043394, NCT00043368, NCT00043420, NCT00070629, NCT00369291, NCT00070642, NCT00233506, NCT00185965, NCT00438880, NCT00880581, NCT00824733 |
| <b>TLR9</b>           | EMD 1201081;<br>IMO-2055     | Nucleic-acid based             | 2   | NCT00729053, NCT00633529, NCT00719199, NCT01040832, NCT01360827                                                                                                                      |
| <b>TLR9</b>           | GNKG168                      | Nucleic-acid based             | 1   | NCT01035216, NCT01743807                                                                                                                                                             |
| <b>TLR9</b>           | SD-101                       | Nucleic-acid based             | 2   | NCT01042379, NCT01745354, NCT02254772, NCT02266147, NCT02521870, NCT02731742, NCT02927964, NCT03007732, NCT03322384,                                                                 |

|                         |                                          |                                      |             |                                                                                                                                                                                                                |
|-------------------------|------------------------------------------|--------------------------------------|-------------|----------------------------------------------------------------------------------------------------------------------------------------------------------------------------------------------------------------|
|                         |                                          |                                      |             | NCT03410901, NCT03831295, NCT04050085, NCT04935229, NCT05220722, NCT05607953                                                                                                                                   |
| <b>TLR9</b>             | MGN1703;<br>lefitolimod                  | Nucleic-acid based                   | 3           | NCT01208194, NCT02200081, NCT02077868, NCT02668770                                                                                                                                                             |
| <b>TLR9</b>             | CMP-001;<br>vidutolimod                  | Virus-like vector for a TLR9 agonist | <u>2</u> /3 | NCT02554812, NCT02680184, NCT03084640, NCT03438318, NCT03618641, NCT03507699, NCT03983668, NCT04401995, NCT04633278, NCT04695977, NCT04698187, NCT04807192, NCT04387071, NCT04708418, NCT04916002, NCT05445609 |
| <b>TLR9</b>             | tilsotolimod;<br>IMO-2125                | Nucleic-acid based                   | 3           | NCT02644967, NCT03052205, NCT03445533, NCT03865082, NCT04126876, NCT04196283, NCT04270864                                                                                                                      |
| <b>TLR9</b>             | DV281                                    | Nucleic-acid based                   | 1           | NCT03326752                                                                                                                                                                                                    |
| <b>TLR9</b>             | cavrotolimod                             | Nucleic-acid based                   | 1/2         | NCT03684785                                                                                                                                                                                                    |
| <b>TREM1</b>            | PY159                                    | mAb                                  | 1           | NCT04682431                                                                                                                                                                                                    |
| <b>VISTA</b>            | CI-8993;<br>Onvatilimab;<br>JNJ-61610588 | mAb                                  | 1           | NCT02671955, NCT04475523                                                                                                                                                                                       |
| <b>VISTA;<br/>PD-L1</b> | CA-170                                   | Small molecule                       | 1           | NCT02812875                                                                                                                                                                                                    |
| <b>VISTA</b>            | W0180                                    | mAb                                  | 1           | NCT04564417                                                                                                                                                                                                    |
| <b>VISTA</b>            | HMBD-002                                 | mAb                                  | 1           | NCT05082610                                                                                                                                                                                                    |
| <b>VISTA</b>            | KVA-12123                                | mAb                                  | <u>1</u> /2 | NCT05708950                                                                                                                                                                                                    |
| <b>VISTA</b>            | SNS-101                                  | mAb                                  | <u>1</u> /2 | NCT05864144                                                                                                                                                                                                    |
| <b>VISTA</b>            | PMC-309                                  | mAb                                  | 1           | NCT05957081                                                                                                                                                                                                    |

\*Therapeutics for the same target and their trial IDs were ordered based on trial start date. Former drug names were omitted, if they did not yield clinicaltrials.gov search results. For TLR agonists, trials investigating the TLR agonist as an adjuvant to cancer vaccine or dendritic cell therapy were excluded.

\*\*Highest trial phase. For phase 1/2 and phase 2/3 trial designs, underlined numbers indicate the phase reported in company pipeline in January 2024.

Ab, antibody; Appr., approved; FAP, fibroblast activation protein alpha; mAb, monoclonal antibody; NA, not available.
